# Supplementary material for: Intravenous thrombolysis in acute ischemic stroke due to intracranial artery dissection: a single-center case series and a review of literature
Source: Springer Nature journal article supplement (doi:10.1007/s11239-019-01918-6), 2019-07-13
Supplement: MOESM1 [file 16926962]

**Supplemental Table 1** – Univariate analysis comparing IAD patients treated with and without IVT

|  | **Overall population**  10 (100%) | **Intracranial dissection**  **IVT**  5 (50%) | **Intracranial dissection**  **Aspirin**  5 (50%) | **p-value** |
| --- | --- | --- | --- | --- |
| **Baseline characteristics** |  |  |  |  |
| Age, years | 50.0 (36.8-63.1) | 62.4 (36.5-66.3) | 49.0 (40.5-51.0) | 0.421 |
| Sex, women | 3 (30%) | 2 (40%) | 1 (20%) | 0.500 |
| Hypertension | 6 (60%) | 3 (60%) | 3 (60%) | 0.738 |
| Diabetes mellitus | 0 (0%) | 0 (0%) | 0 (0%) | NA |
| Dyslipidemia | 6 (60%) | 3 (60%) | 3 (60%) | 0.738 |
| Smoking | 3 (30%) | 1 (20%) | 2 (40%) | 0.500 |
| Baseline stroke severity (NIHSS) | 8.5 (3.3-15.3) | 11.0 (5.5-17.0) | 7.0 (1.0-14.5) | 0.310 |
| ASPECTS or pc-ASPECTS admission | 10.0 (9.0-10.0) | 10 (10-10) | 9.0 (6.5-10.0) | 0.151 |
| Anterior circulation dissection | 4 (40%) | 3 (60%) | 1 (20%) | 0.262 |
| Dissection occlusion | 7 (70%) | 3 (60%) | 4 (80%) | 0.500 |
| Dissection stenosis | 3 (30%) | 2 (40%) | 1 (20%) | 0.500 |
| Onset to door time, minutes | 185.5 (57.8-664.0) | 64.0 (38.0-82.5) | 637.0 (313.0-1020.5) | 0.008 |
| Onset to needle time, minutes | 85.0 (68.0-107.5) | 85.0 (68.0-107.5) | NA | NA |
| **Outcome variables** |  |  |  |  |
| Favorable outcome at three months (mRS 0-2) | 8 (80%) | 3 (60%) | 5 (100%) | 0.222 |
| Change in NIHSS over 24ha | 0.0 (-4.3-6.0) | 3 (-9.5-18.5) | 0.0 (-2.5-0) | 0.690 |
| Mortality within seven days | 2 (20%) | 2 (40%) | 0 (0%) | 0.222 |
| Intracranial hemorrhage | 2 (20%) | 1 (20%) | 1 (20%) | 0.778 |
| Symptomatic ICH | 0 (0%) | 0 (0%) | 0 (0%) | NA |

NIHSS – National Institutes of Health Stroke Scale; ASPECTS – Alberta Stroke Program Early CT Score; pc – posterior circulation; IVT – intravenous thrombolysis; ICH – intracranial hemorrhage; mRS – modified Rankin Scale; NA – not applicable

a – negative values indicate clinical improvement
